# Supplementary material for: miRge - A Multiplexed Method of Processing Small RNA-Seq Data to Determine MicroRNA Entropy
Source: PubMed Central journal article supplement (PMC4646525; doi:10.1371/journal.pone.0143066), 2015-11-16

### miRNA entropy distribution with all reads included

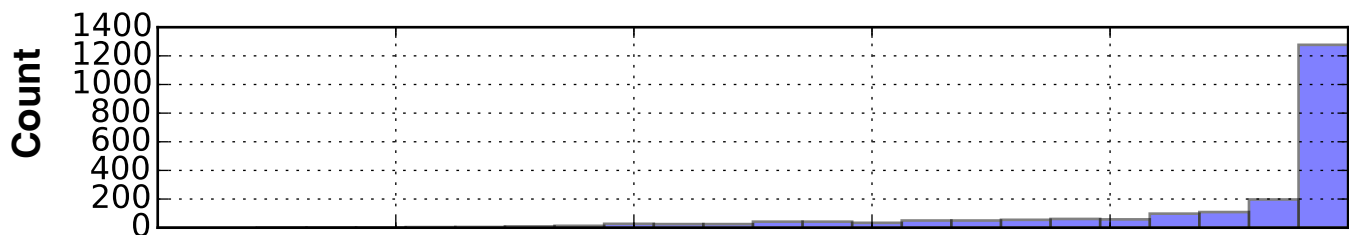

### miRNA entropy distribution reads <= 1 excluded

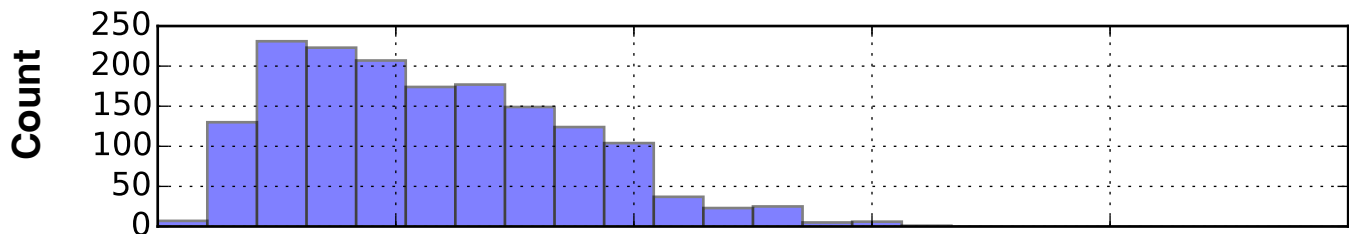

### miRNA entropy Distribution with reads <= 2 excluded

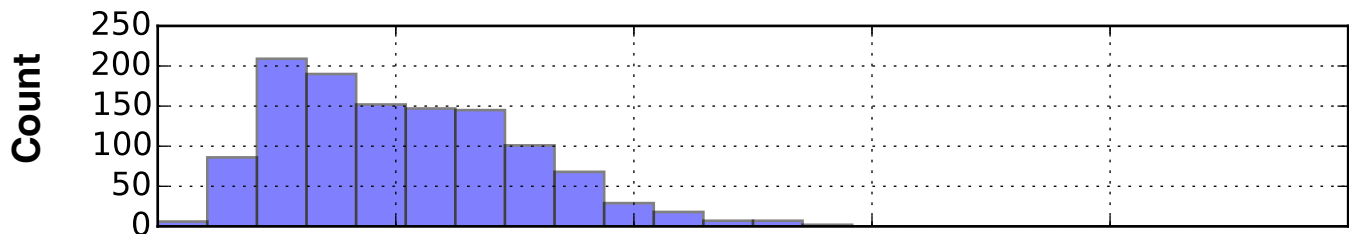

### miRNA entropy Distribution with reads <= 3 excluded

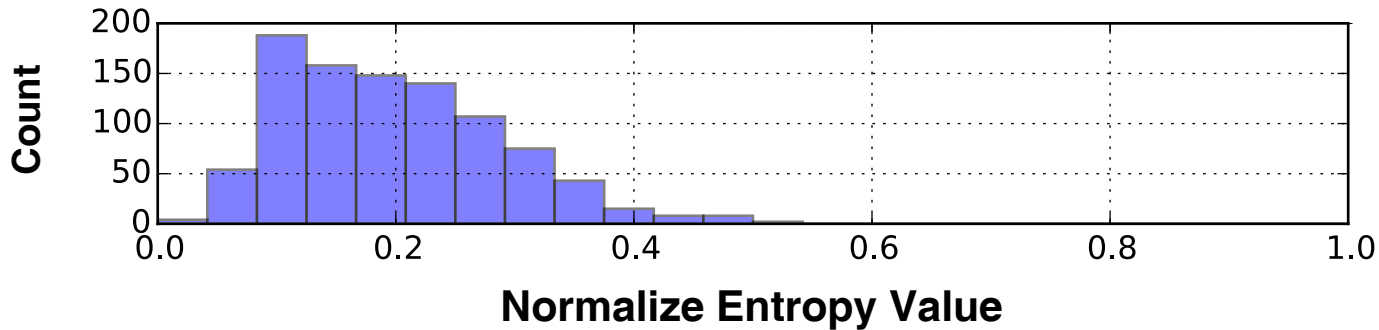

Supplement: pone.0143066.s001.pdf [file pone.0143066.s001.pdf]
