# Supplementary material for: miRge - A Multiplexed Method of Processing Small RNA-Seq Data to Determine MicroRNA Entropy
Source: PLoS One. 2015 Nov 16;10(11):e0143066. doi: 10.1371/journal.pone.0143066 (PMC4646525; doi:10.1371/journal.pone.0143066)
Supplement: S8 File — These ENSMUST files each contained miRNAs and were removed to avoid misalignments in the miRge workflow. (XLSX) [file pone.0143066.s009.xlsx]

## Sheet: Sheet1
Removed Record	contained miRNA
ENSMUST00000134140	mmu-miR-17-92a cluster
ENSMUST00000144604	mmu-miR-101a
ENSMUST00000134345	mmu-miR-22
ENSMUST00000149940	mmu-miR-22
ENSMUST00000175699	mmu-miR-30d
ENSMUST00000181490	mmu-let-7d
ENSMUST00000180385	mmu-miR-1839
ENSMUST00000182303	mmu-miR-30c-2
ENSMUST00000182158	mmu-miR-181a / mmu-miR-181b
ENSMUST00000139662	mmu-miR-99a-2
ENSMUST00000158911	mmu-miR-1843b-5p
ENSMUST00000133125	mmu-miR-223
ENSMUST00000147681	mmu-miR-223
ENSMUST00000104383	mmu-miR-664
ENSMUST00000175366	mmu-miR-1839
